# Supplementary material for: Seismic Deformation of Himalayan Glaciers Using Synthetic Aperture Radar Interferometry
Source: Copernicus journal article supplement (doi:10.5194/egusphere-2023-2253), 2023-12-12
Supplement: Supplementary file [file egusphere-2023-2253-AC3-supplement.pdf]

## Supplementary Information

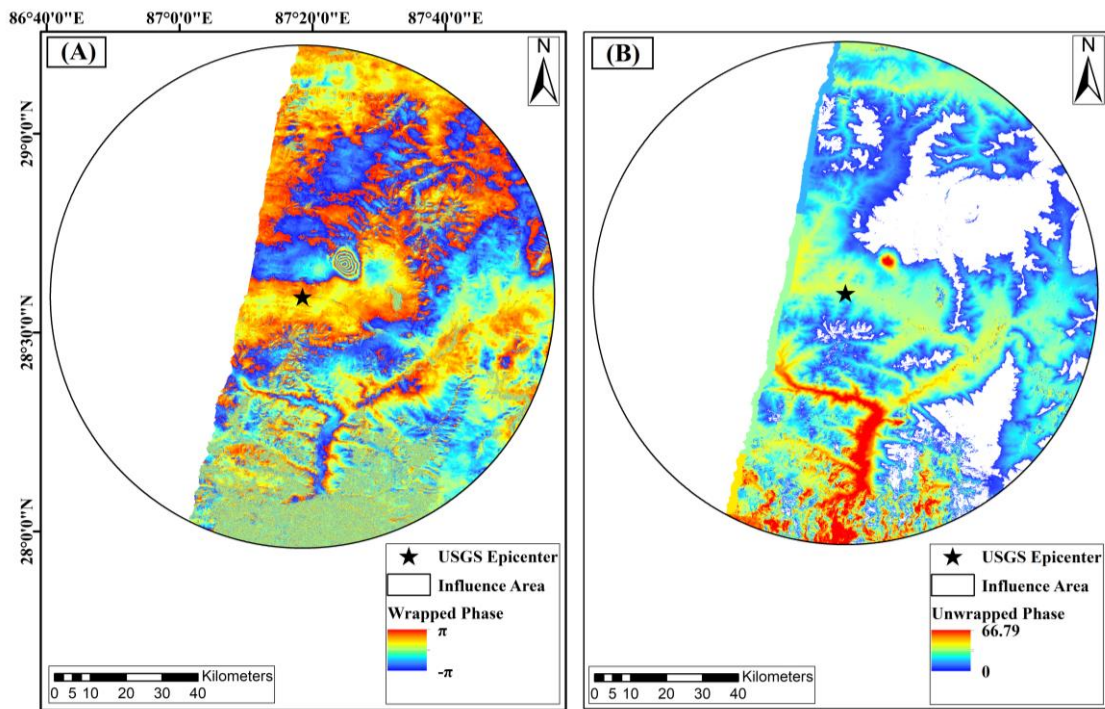

Figure S1: Map showing (A) wrapped phase and (B) unwrapped phase within the influence area for 2020 Tibet earthquake (Mw 5.7).

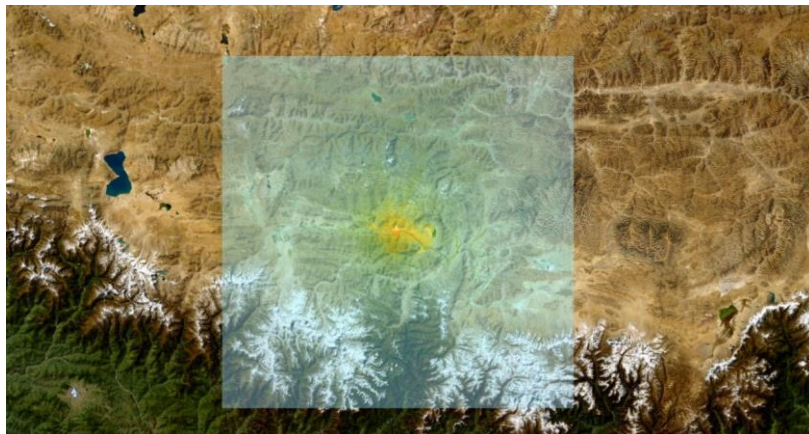

Figure S2: USGS Shake Map for 2020 Tibet earthquake (Mw 5.7).

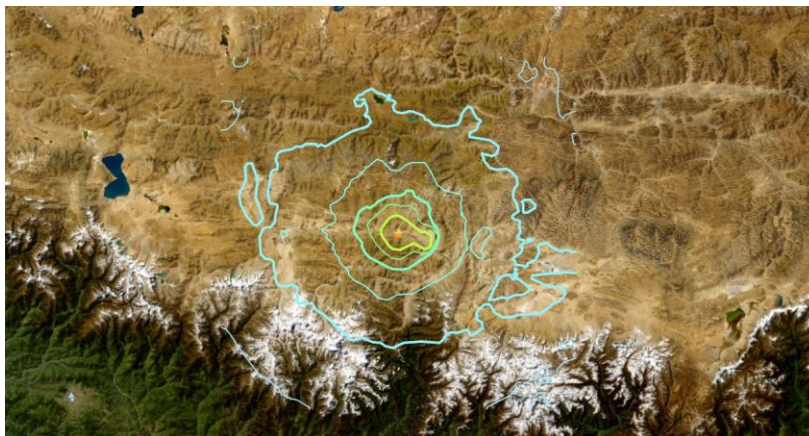

## Supplementary Information

|           |          |        |       |            |        |             |                |         |            |
|-----------|----------|--------|-------|------------|--------|-------------|----------------|---------|------------|
| SHAKING   | Not felt | Weak   | Light | Moderate   | Strong | Very strong | Severe         | Violent | Extreme    |
| DAMAGE    | None     | None   | None  | Very light | Light  | Moderate    | Moderate/heavy | Heavy   | Very heavy |
| PGA(%g)   | <0.0464  | 0.297  | 2.76  | 6.2        | 11.5   | 21.5        | 40.1           | 74.7    | >139       |
| PGV(cm/s) | <0.0215  | 0.135  | 1.41  | 4.65       | 9.64   | 20          | 41.4           | 85.8    | >178       |
| INTENSITY | I        | II-III | IV    | V          | VI     | VII         | VIII           | IX      | X+         |

Scale based on Worden et al. (2012) Version 1: Processed 2022-01-25T17:06:17Z  
 △ Seismic Instrument    ○ Reported Intensity    ★ Epicenter

Figure S3: USGS Isoseismal contours and the MMI chart for 2020 Tibet earthquake (Mw 5.7).

Table S1: Different focal mechanism solutions for the earthquake events considered in the study

| Earthquake<br>(Event ID) | Latitude (°) | Longitude (°) | Depth<br>(km) | Nodal Plane-I |       |        | Nodal Plane-II |       |        | M <sub>w</sub> | Source |
|--------------------------|--------------|---------------|---------------|---------------|-------|--------|----------------|-------|--------|----------------|--------|
|                          |              |               |               | Strike-1      | Dip-1 | Rake-1 | Strike-2       | Dip-2 | Rake-3 |                |        |
| Tibet EQ<br>(617805561)  | 28.601       | 87.321        | 7             | 162           | 48    | 97     | 353            | 42    | 82     | 5.6            | IPGP   |
|                          | 28.648       | 87.331        | 13            | 185.08        | 40.47 | 66.51  | 335.34         | 53.47 | 108.78 | 5.7            | GFZ    |
|                          | 28.4065      | 87.2159       | 13.5          | 179.75        | 41.86 | 77.23  | 342.83         | 49.4  | 101.2  | 5.7            | NEIC   |
|                          | 28.51        | 87.42         | 12            | 184           | 47    | 77     | 345            | 45    | 103    | 5.7            | GCMT   |
| Leh EQ<br>(619321061)    | 34.208       | 78.205        | 10            | 27.62         | 40.6  | 94.12  | 213.04         | 49.53 | 86.48  | 5.1            | GFZ    |
|                          | 35.415       | 77.5847       | 80.5          | 87.05         | 45.63 | 100.39 | 252.36         | 45.32 | 79.55  | 5.2            | NEIC   |
| Thang EQ<br>(611835462)  | 35.74        | 77.45         | 118.1         | 118           | 65    | 74     | 332            | 30    | 120    | 5.2            | GCMT   |

**Note:** **IPGP**- Institut de Physique du Globe de Paris; **GFZ**- German Research Centre for Geosciences; **NEIC**-National Earthquake Information Center; **GCMT**- Global Centroid-Moment-Tensor Project

# Supplementary Information

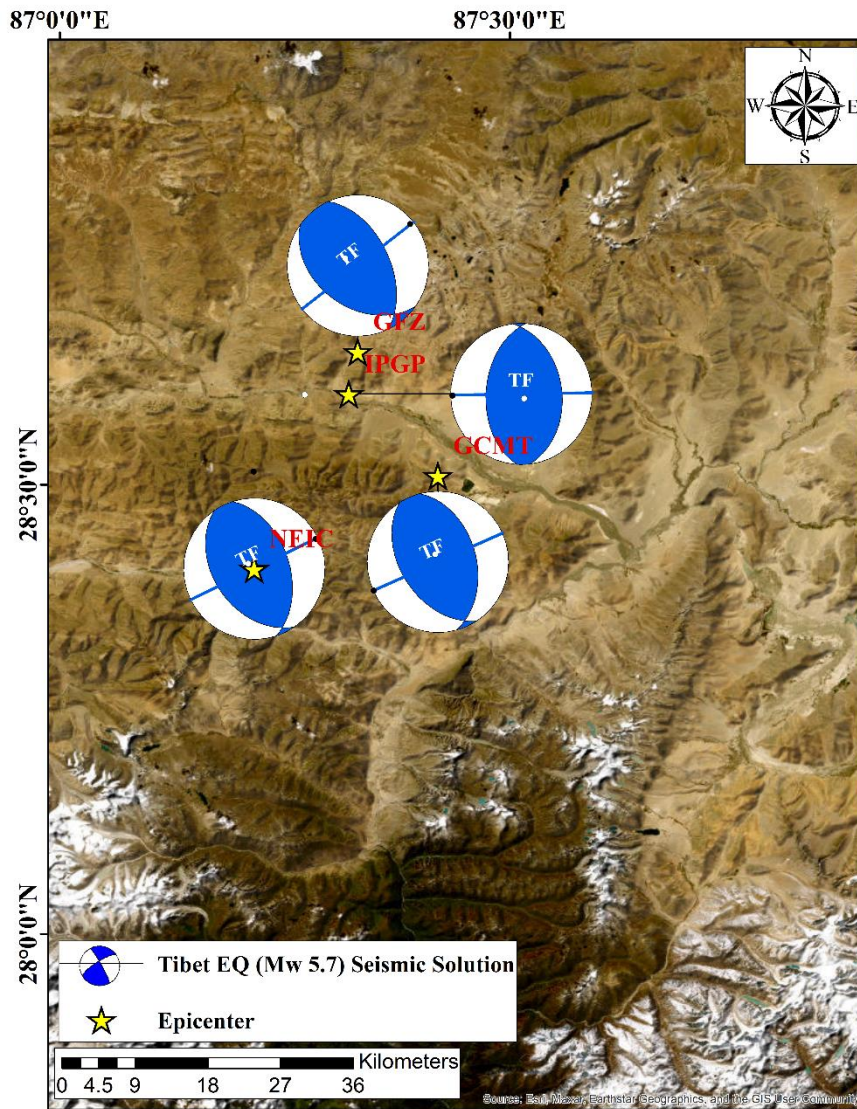

Figure S4: Beach ball representation for the focal mechanism solutions of the 2020 Tibet Earthquake ( $M_w$  5.7).

## Supplementary Information

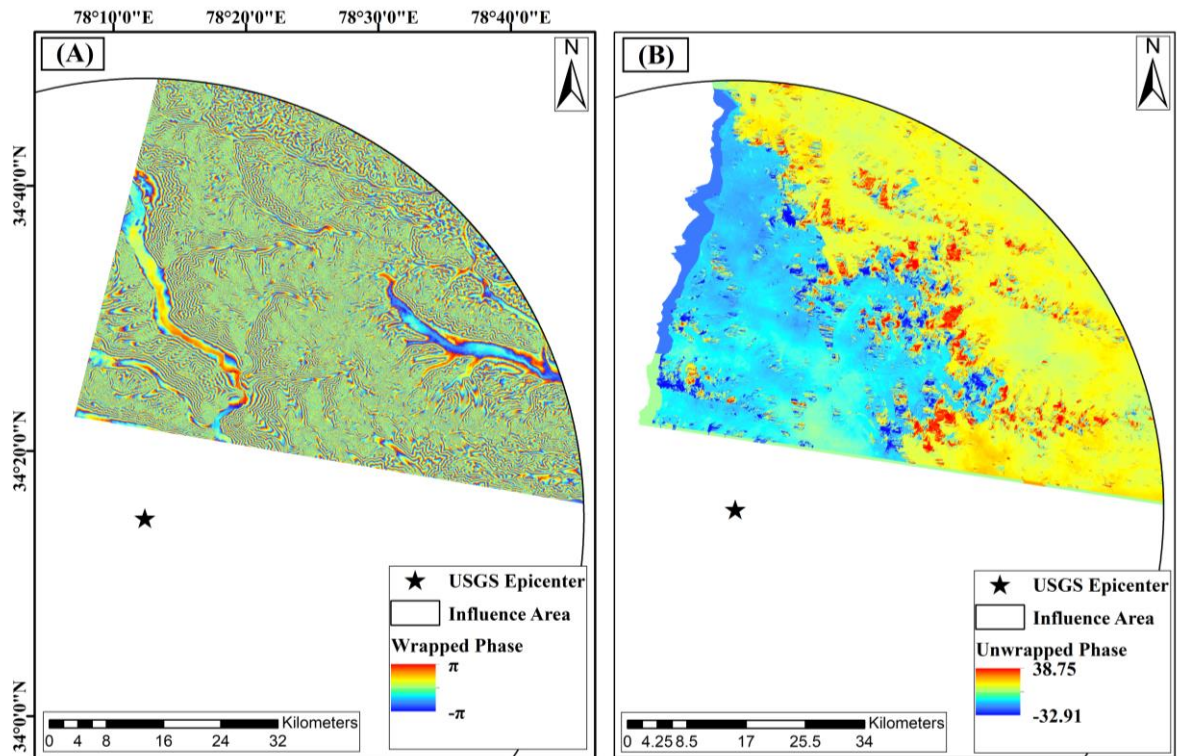

Figure S5: Map showing (A) wrapped phase and (B) unwrapped phase within the influence area for 2020 Leh earthquake (Mw 5.3).

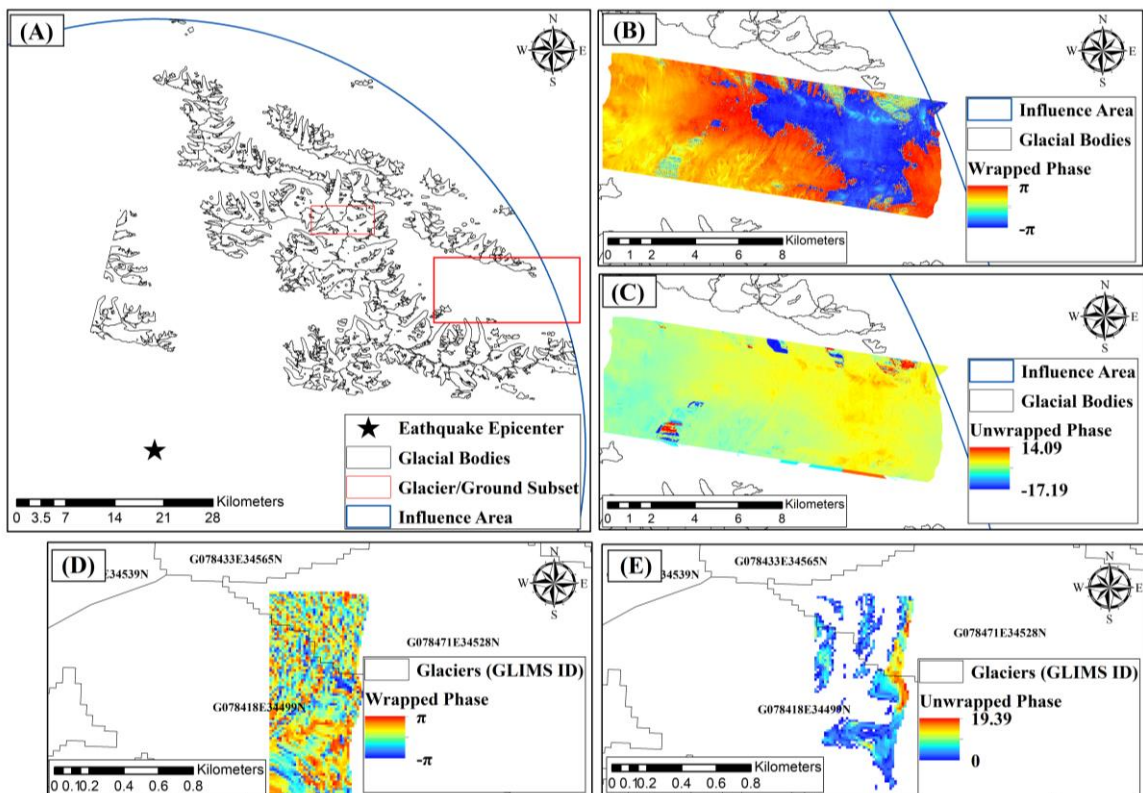

Figure S6: Map showing (A) glacial and ground subset regions, (B) wrapped phase within ground subset, (C) unwrapped phase within ground subset, (D) wrapped phase within glacial subset and (E) unwrapped phase within glacial subset for 2020 Leh earthquake (Mw 5.3).

# Supplementary Information

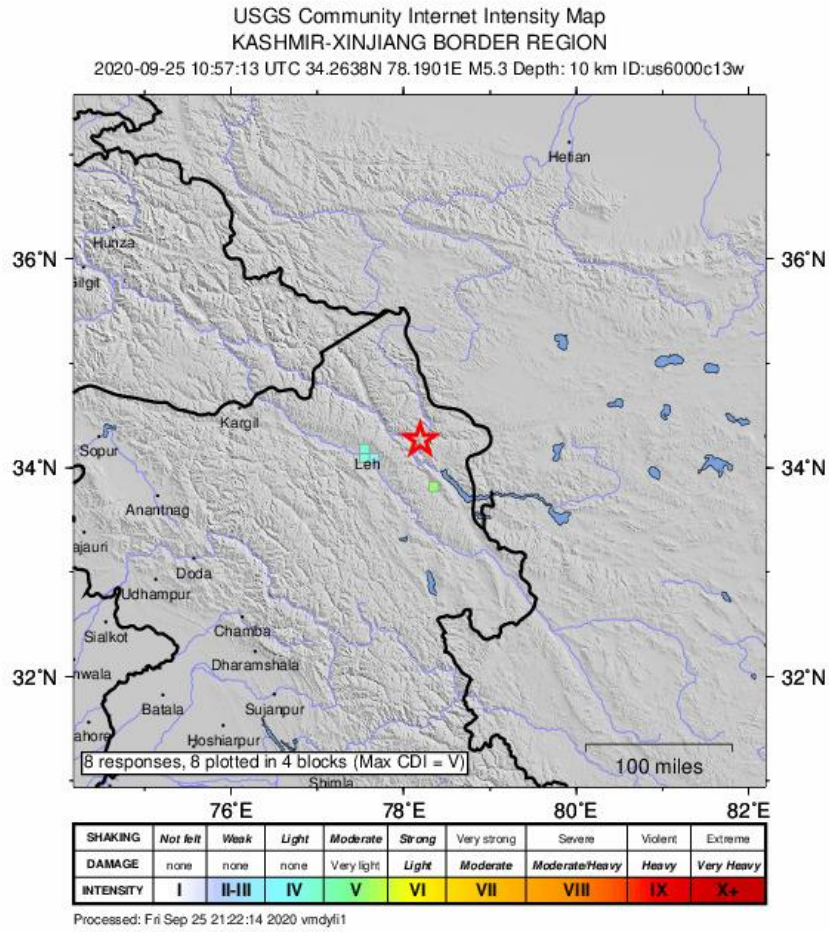

Figure S7: USGS Shake Map for 2020 Leh earthquake (Mw 5.3).

## Supplementary Information

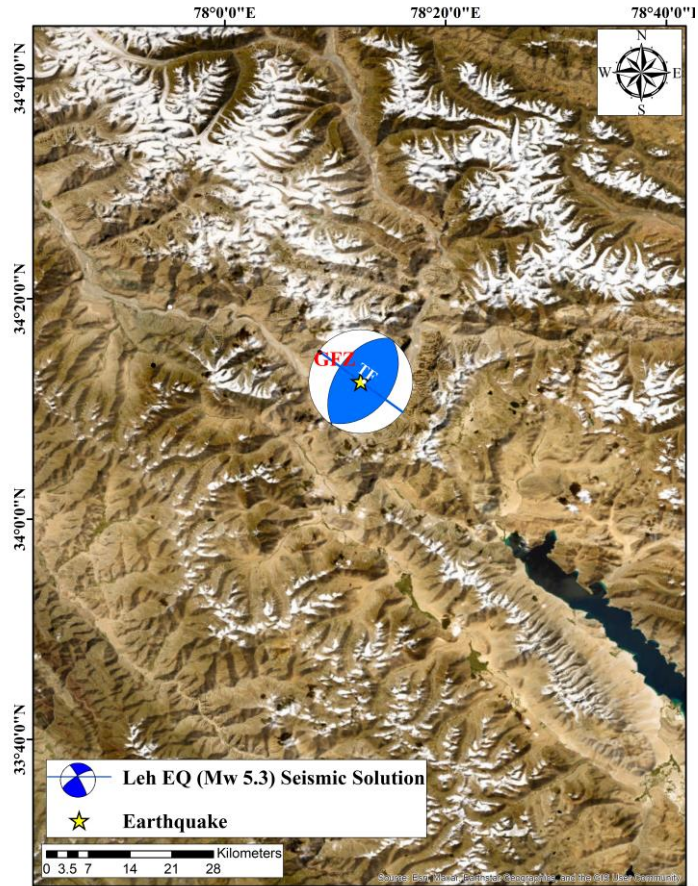

Figure S8: Beach ball representation for the focal mechanism solutions of the 2020 Leh Earthquake ( $M_w$  5.3).

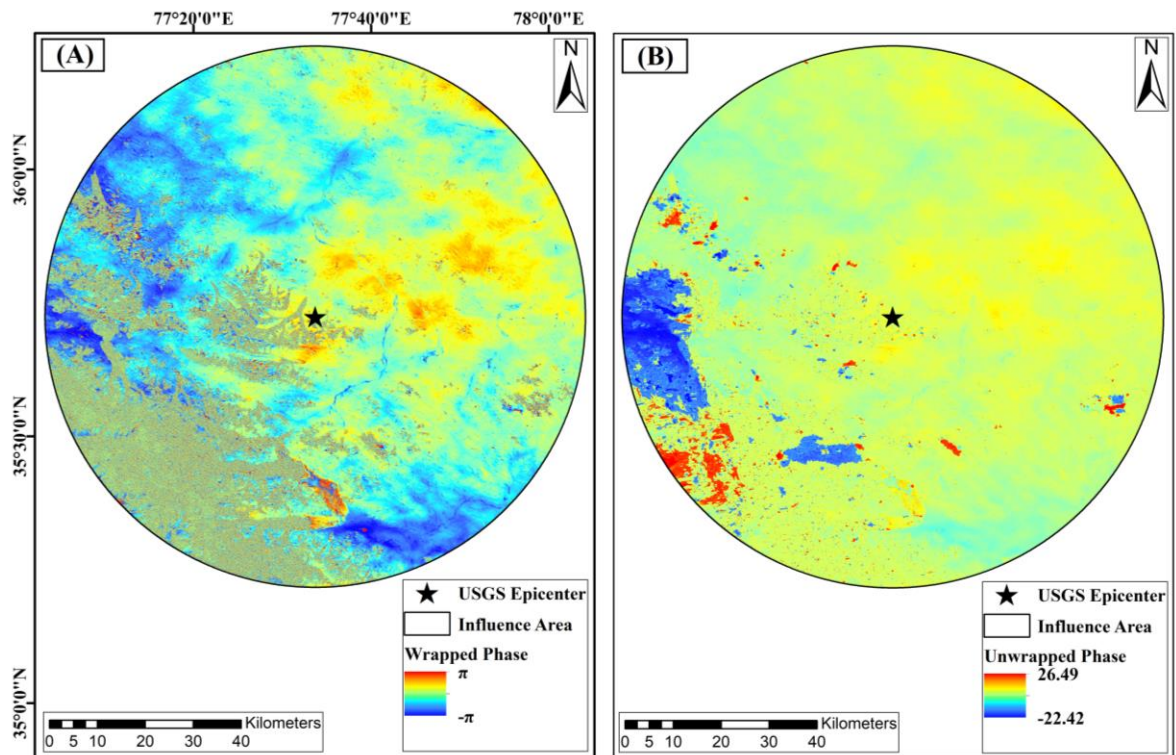

Figure S9: Map showing (A) wrapped phase and (B) unwrapped phase within the influence area for 2017 Thang earthquake ( $M_w$  5.2).

## Supplementary Information

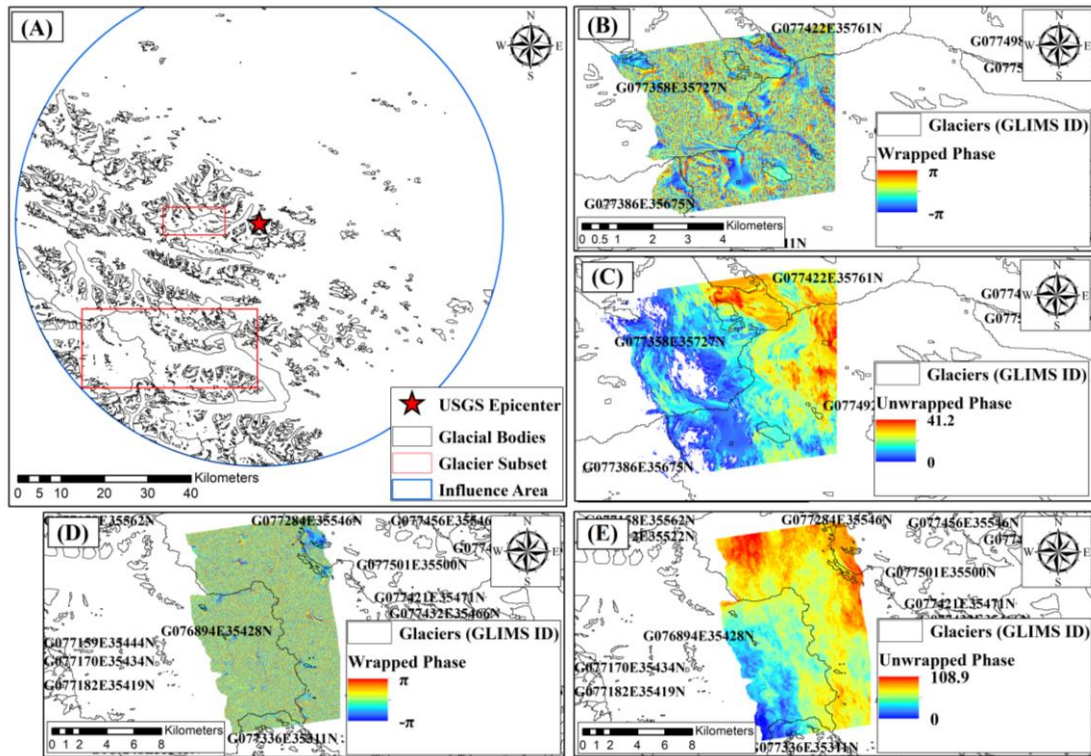

Figure S10: Map showing (A) glacial subset regions, (B) wrapped phase within glacial subset-1, (C) unwrapped phase within glacial subset-1, (D) wrapped phase within glacial subset-2 and (E) unwrapped phase within glacial subset-2 for 2017 Thang earthquake (Mw 5.2).

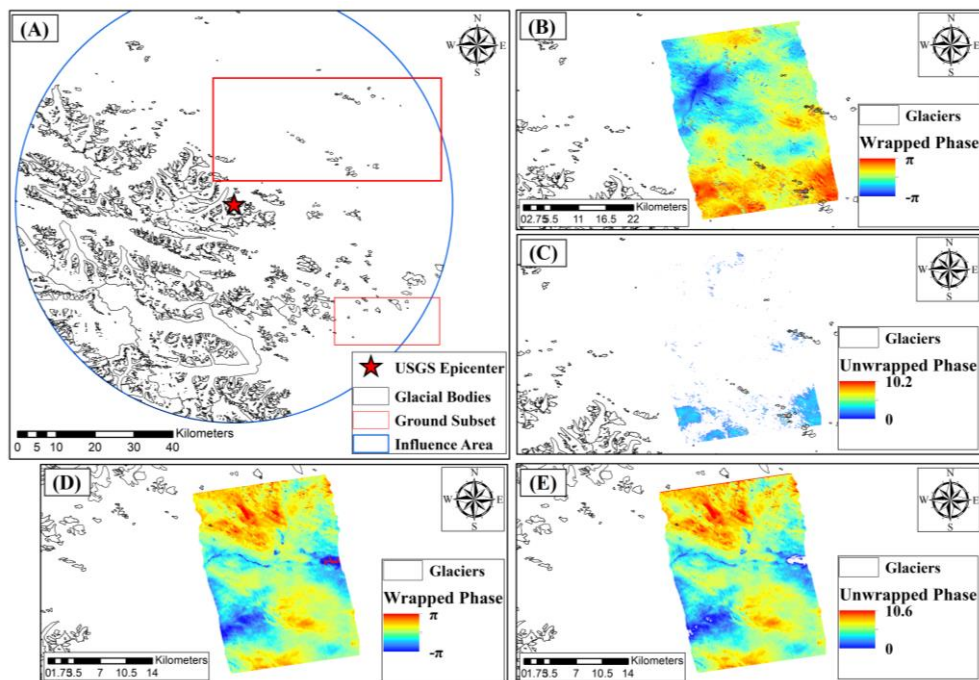

Figure S11: Map showing (A) ground subset regions, (B) wrapped phase within ground subset-1, (C) unwrapped phase within ground subset-1, (D) wrapped phase within ground subset-2 and (E) unwrapped phase within ground subset-2 for 2017 Thang earthquake (Mw 5.2).

# Supplementary Information

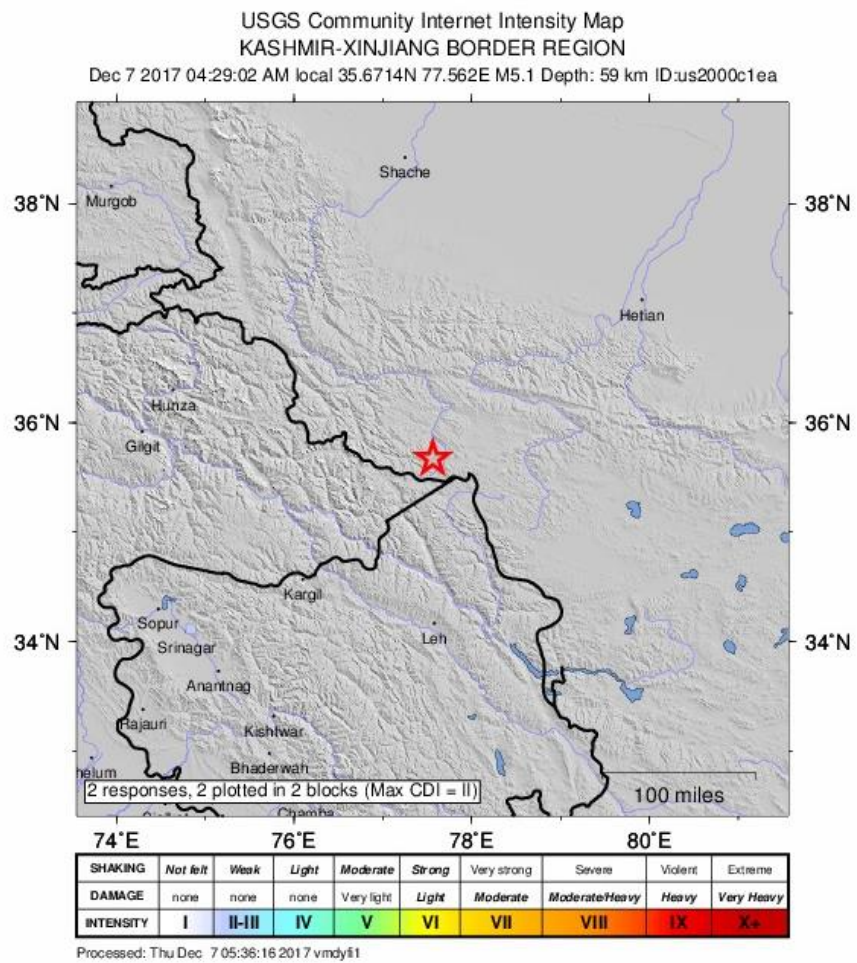

Figure S12: USGS Shake Map for 2017 Thang earthquake (Mw 5.2).



# Supplementary Information

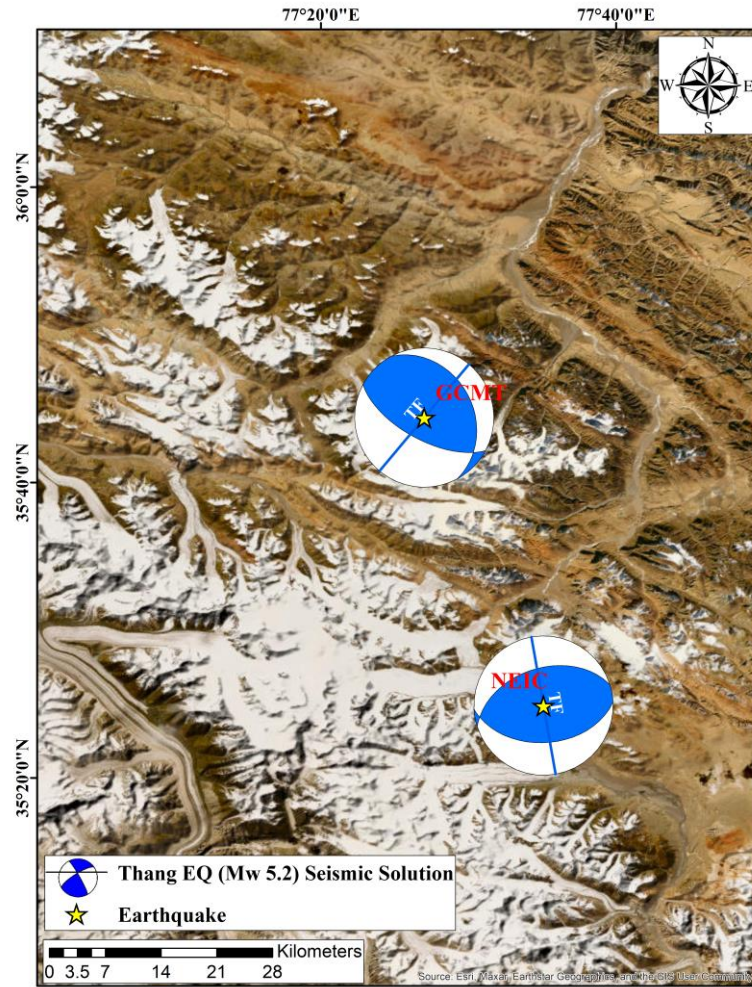

Figure S13: Beach ball representation for the focal mechanism solutions of the 2017 Thang Earthquake (M<sub>w</sub> 5.2)

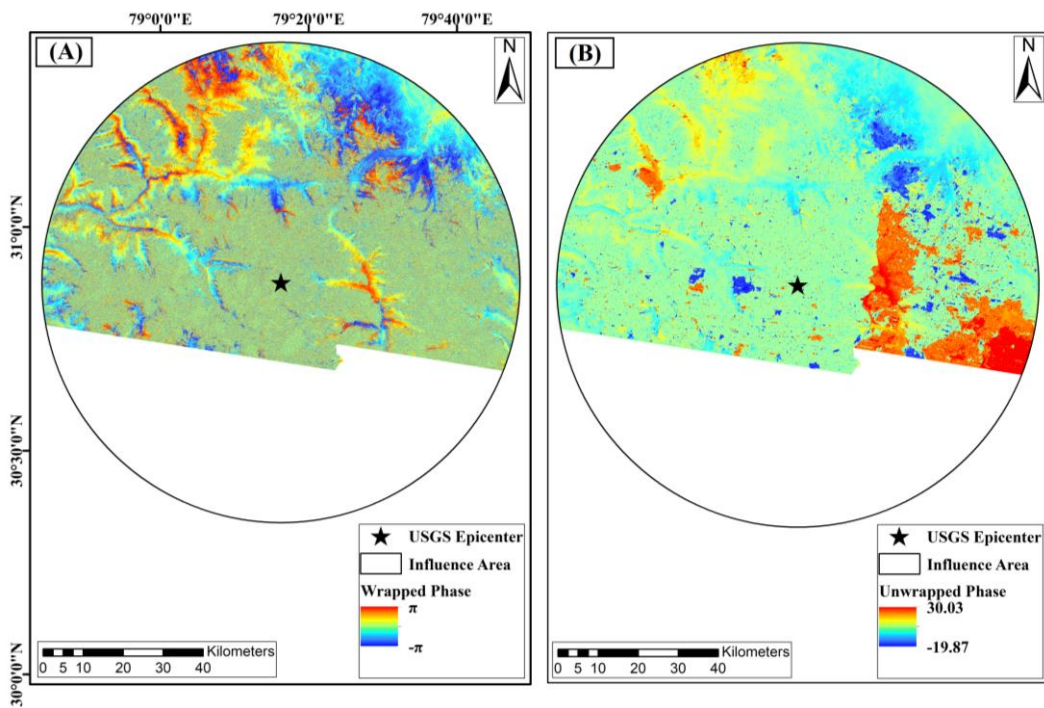

## Supplementary Information

Figure S14: Map showing (A) wrapped phase and (B) unwrapped phase within the influence area for 2021 Joshimath earthquake (Mw 4.5).

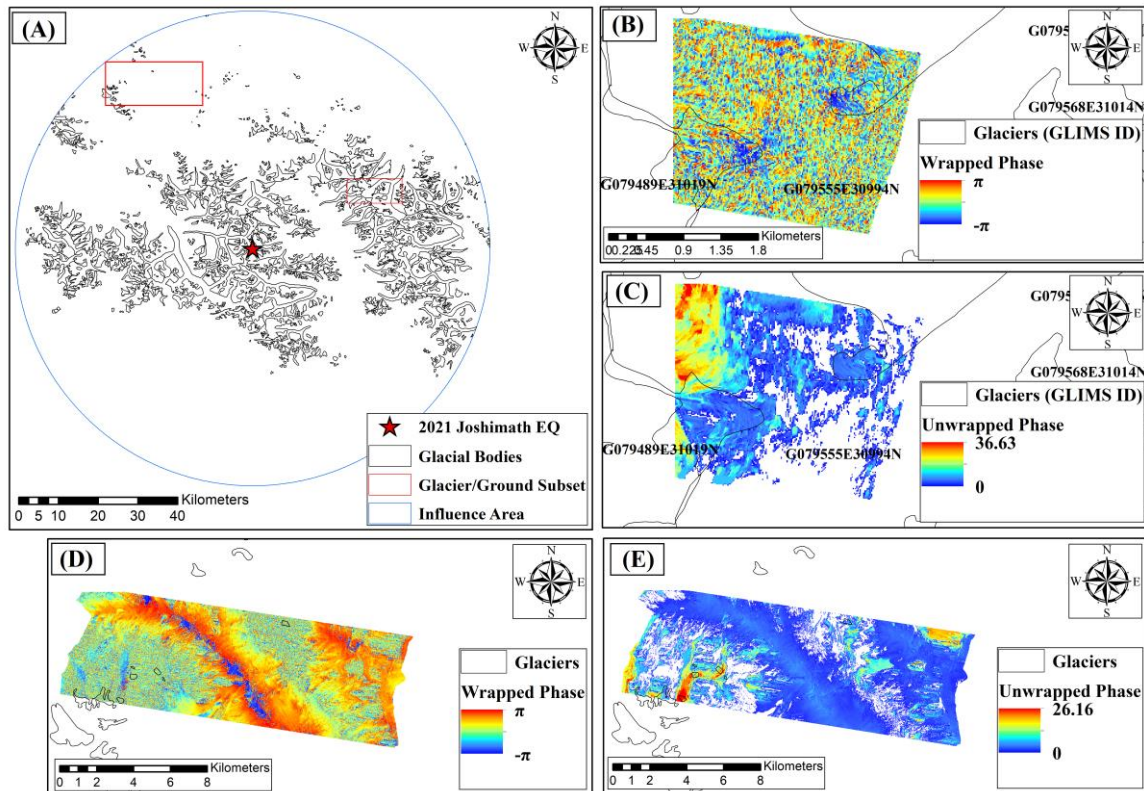

Figure S15: Map showing (A) ground and glacial subset regions, (B) wrapped phase within glacial subset, (C) unwrapped phase within glacial subset, (D) wrapped phase within ground subset and (E) unwrapped phase within ground subset for 2021 Joshimath earthquake (Mw 4.5).

# Supplementary Information

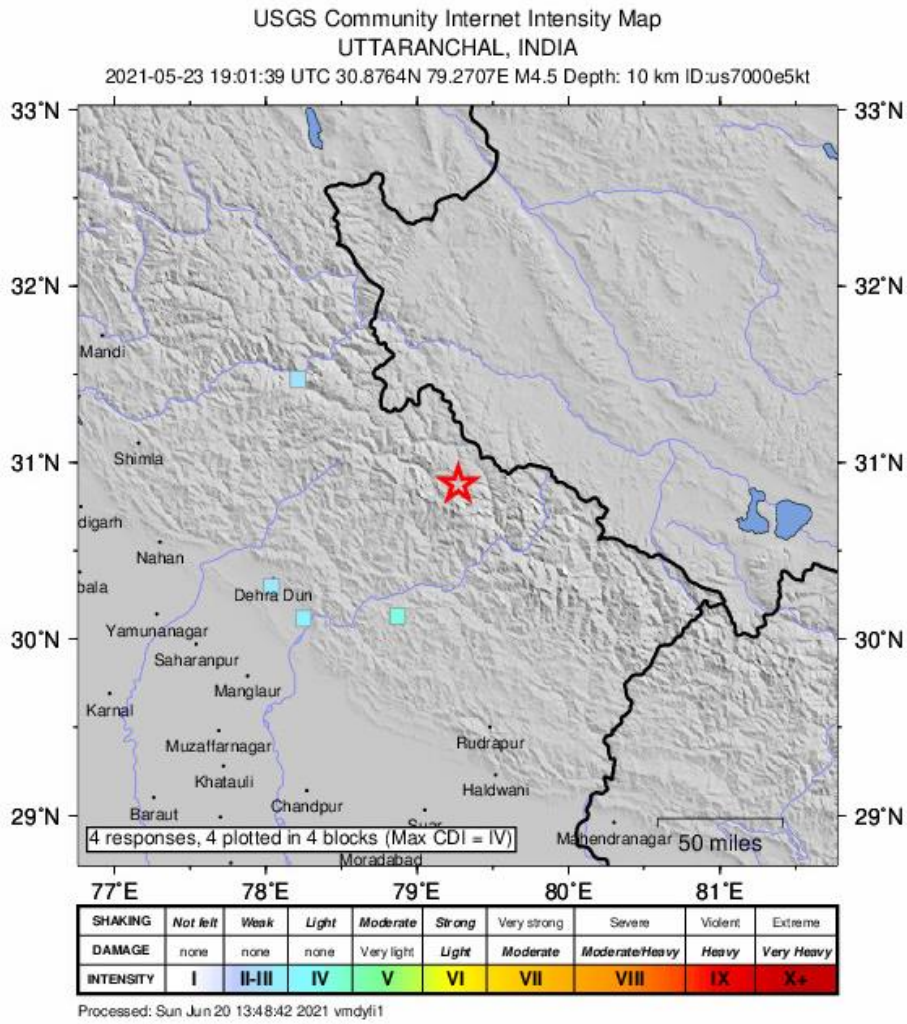

Figure S16: USGS Shake Map for 2021 Joshimath earthquake (Mw 4.5).

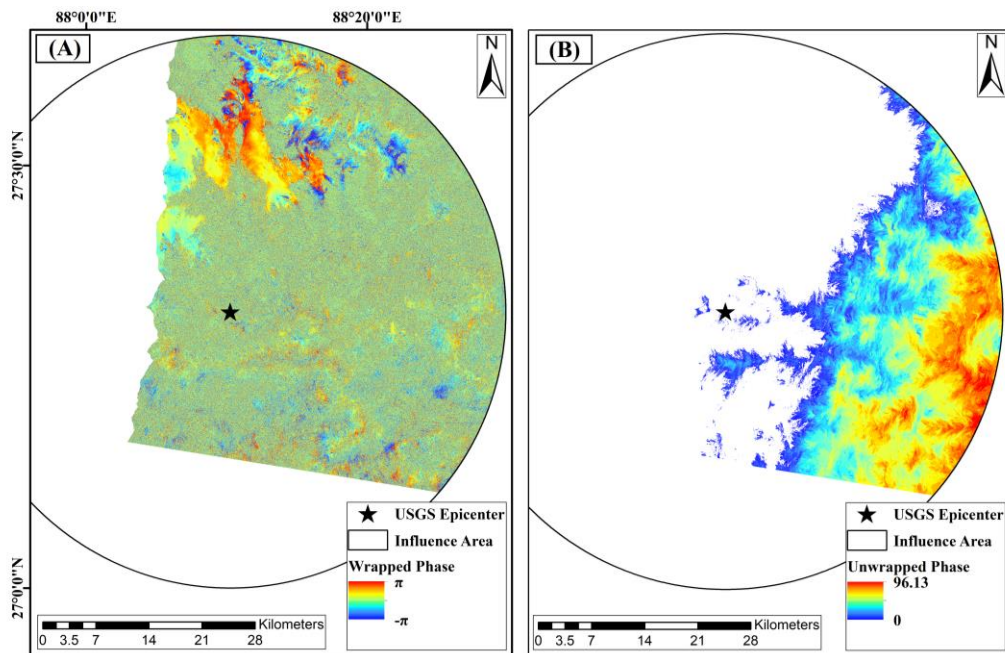

Figure S17: Map showing (A) wrapped phase and (B) unwrapped phase within the influence area for 2017 Sikkim earthquake (Mw 4.2).

## Supplementary Information

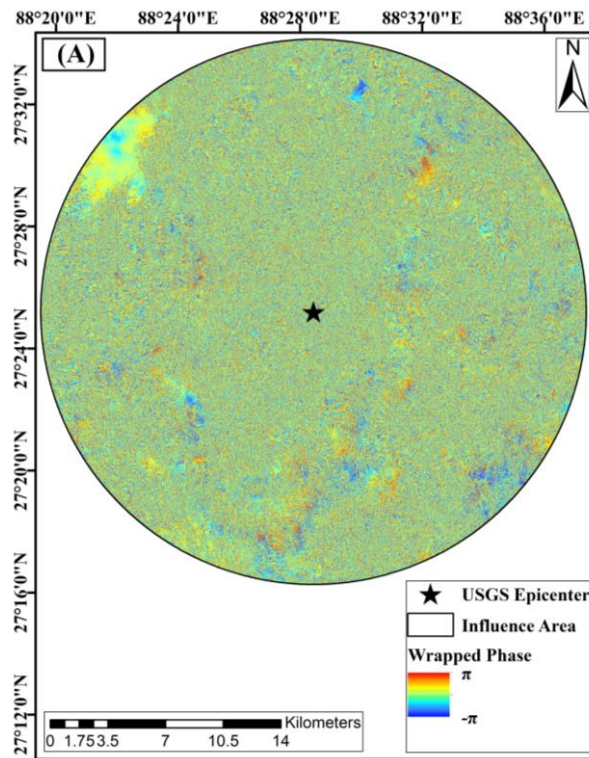

Figure S18: Map showing wrapped phase (no information captured in unwrapping) within the influence area for 2018 Sikkim earthquake (Mw 4.4).

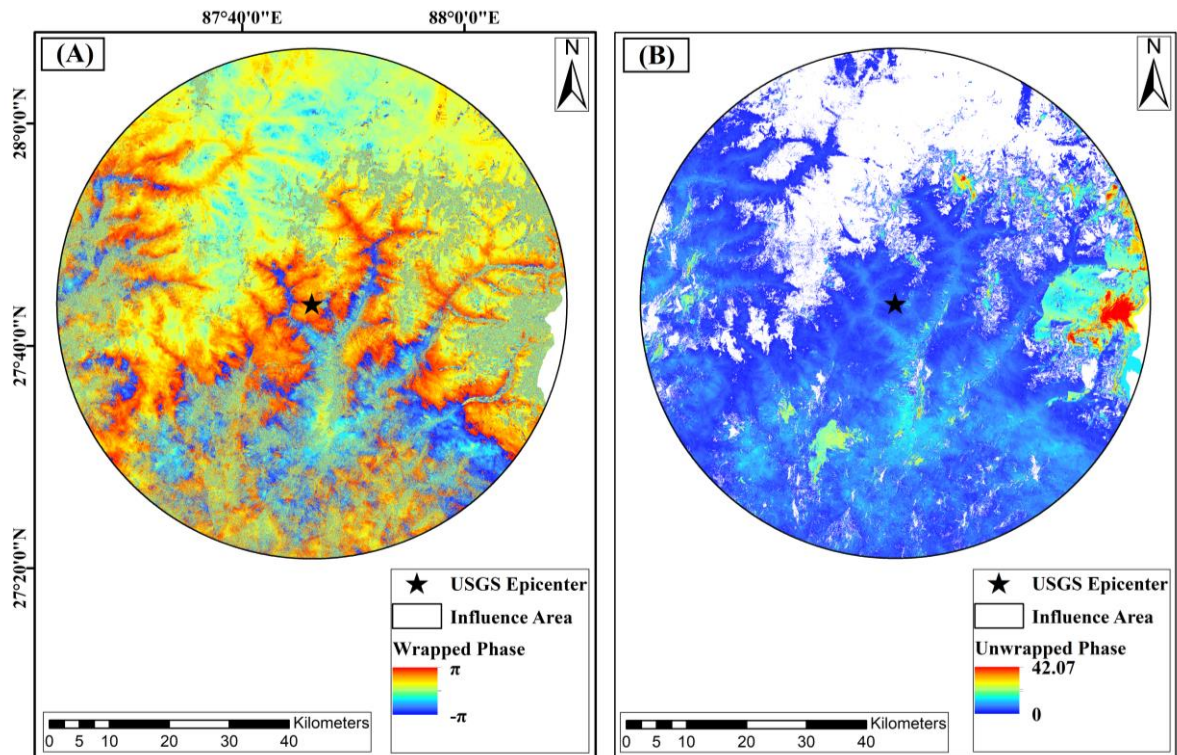

Figure S19: Map showing (A) wrapped phase and (B) unwrapped phase within the influence area for 2020 Nepal earthquake (Mw 4.1).

## Supplementary Information

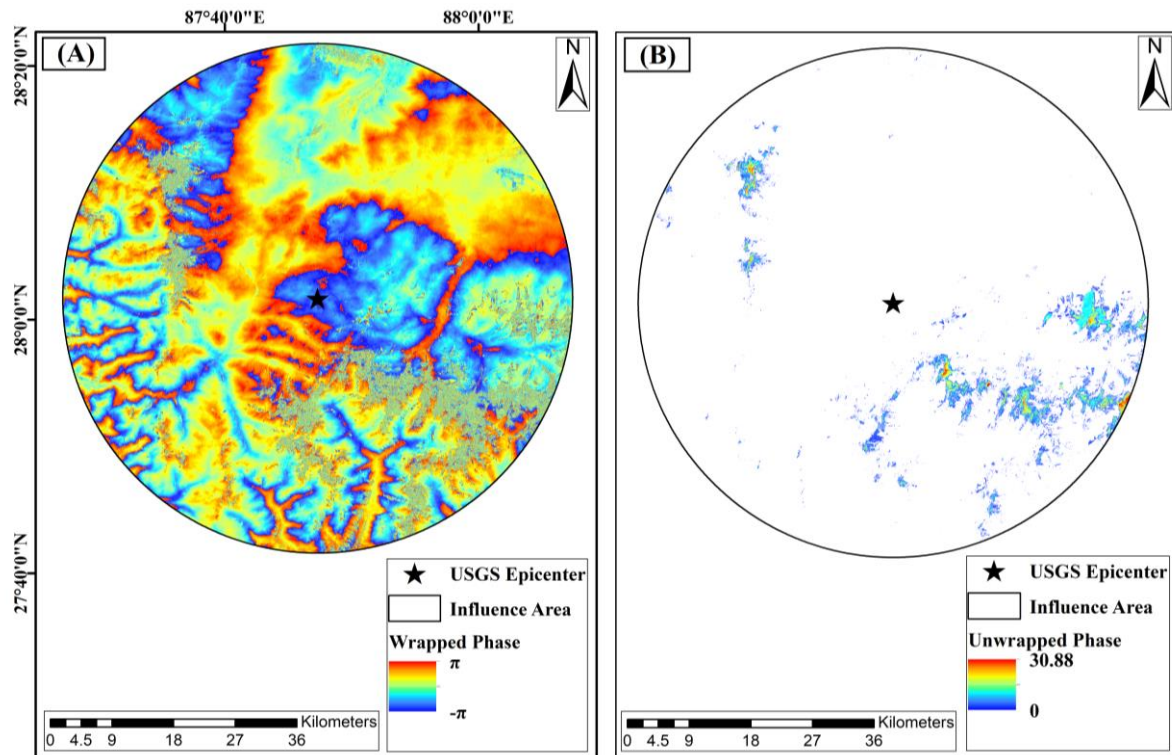

Figure S20: Map showing (A) wrapped phase and (B) unwrapped phase within the influence area for 2021 Nepal earthquake (Mw 4.1).
